# Supplementary material for: An orally available, brain penetrant, small molecule lowers huntingtin levels by enhancing pseudoexon inclusion
Source: PubMed Central journal article supplement (PMC8894458; doi:10.1038/s41467-022-28653-6), 2022-03-03
Supplement: 41467_2022_28653_MOESM1_ESM.pdf [file 41467_2022_28653_MOESM1_ESM.pdf]

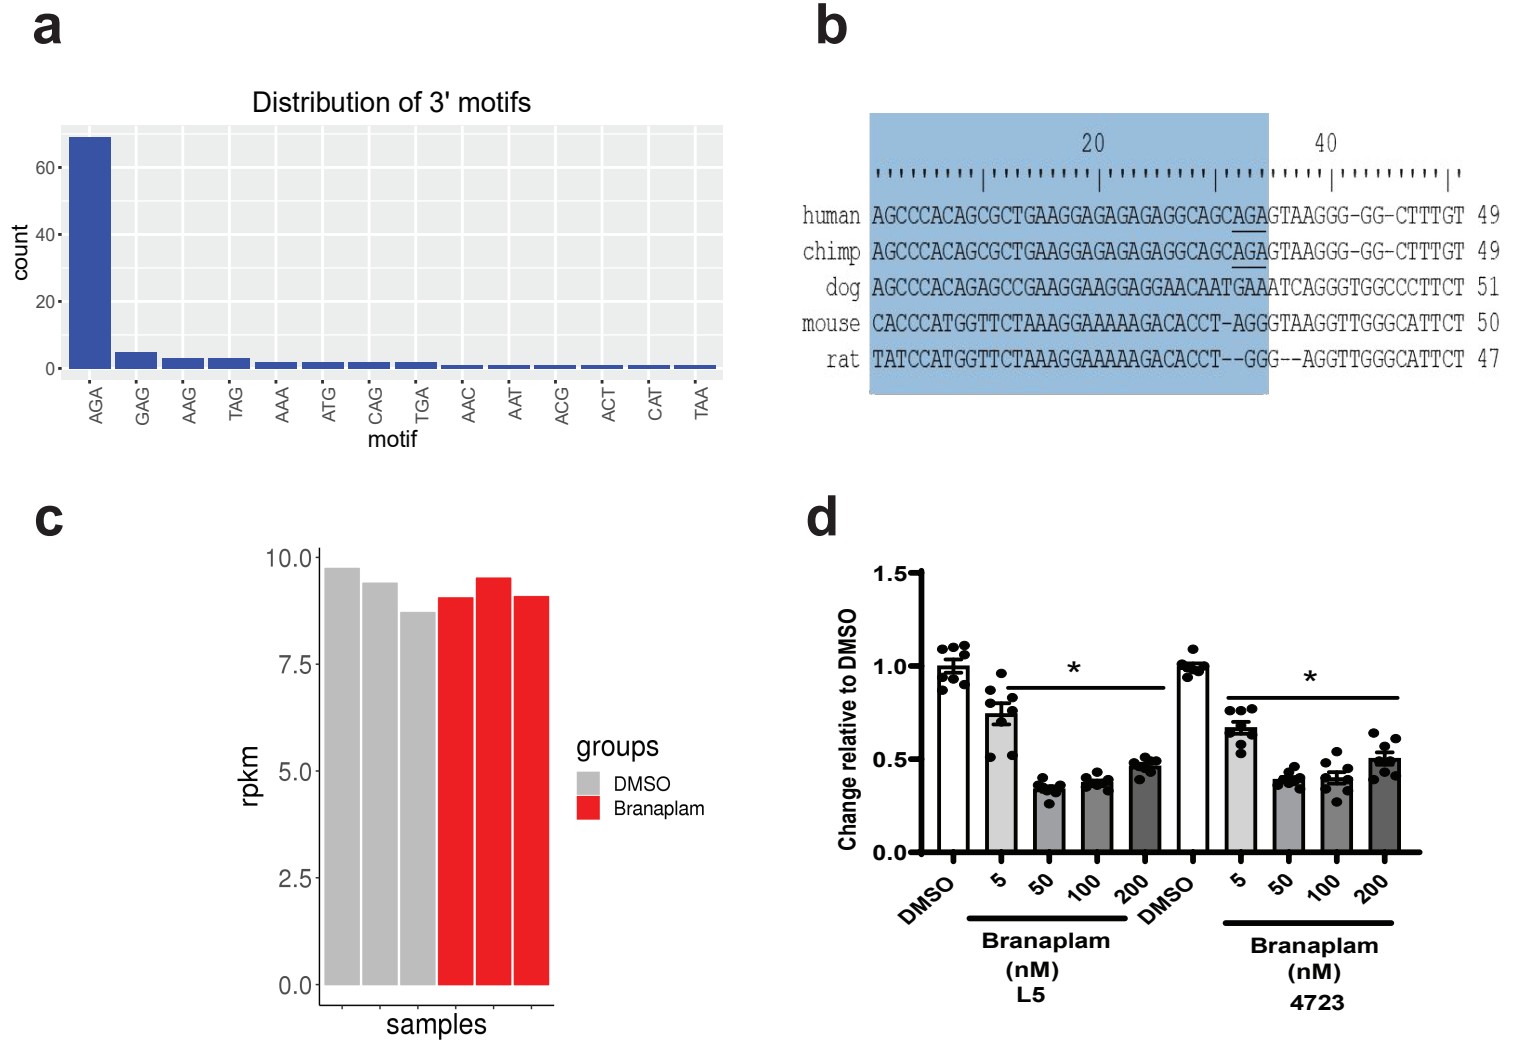

**Supplementary Data Figure 1.** Sequence alignment and conservation of the 3' exonic motif and modulation of mouse and human *HTT* transcripts by branaplam. **a**, Histogram of 3' ends (XXX|[last 3 bases exonic]) for the 94 differential pseudoexons in Figure 1B that map to GENCODE genes **b**, Alignment and conservation of the sequence of the novel HTT exon across human, chimpanzee, dog, mouse, and rat species. Blue shading indicates putative exonic sequences. **c**, Mouse Htt transcript expression values from RNA-seq experiments in NSC34 cells following DMSO (grey) and branaplam (red) treatments. **d**, Quantitative PCR results showing total HTT mRNA expression levels after DMSO or Branaplam treatment (at indicated doses) for 24 hrs. Two independent HD patient fibroblast cell lines (GM04723 (4723) and ND31551 (L5)), and a taqman assay priming for human HTT exon 1-2 was used. Samples are normalized to human GAPDH, and data are the mean  $\pm$  SEM relative to HD fibroblasts treated with DMSO (4 biological replicates, \*P < 0.001, one-way ANOVA followed by a Bonferroni's post hoc).

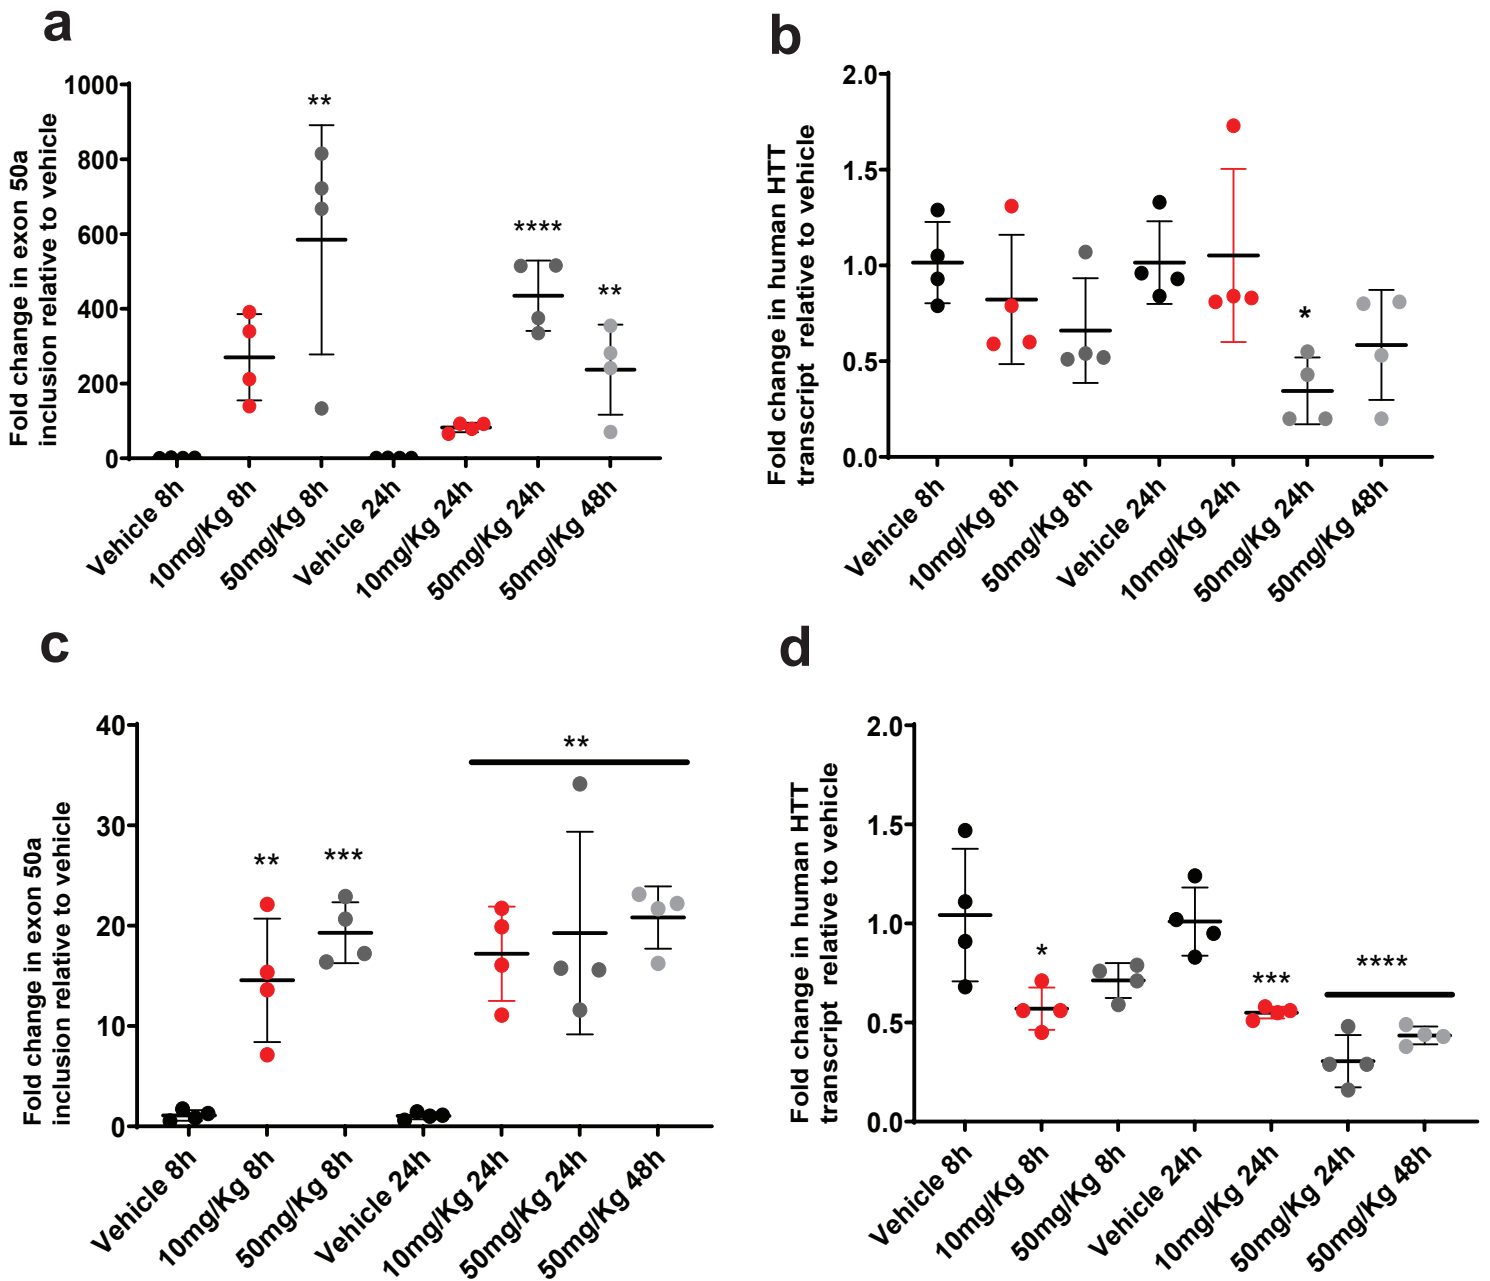

**Supplementary Data Figure 2.** Modulation of *HTT* transcripts in the brain and blood of BacHD mice after a single oral dose of branaplam. **a**, pseudoexon 50a included transcript in the cerebrum of BacHD mice (n=4) treated with 10 mg /kg or 50 mg/kg of branaplam and taken down at indicated timepoints. Data are the mean±SEM of 4 mice per group. One-way Anova with Dunnett's multiple comparisons test: \*\*P = 0.0034 or 0.0020, \*\*\*\*P < 0.0001. **b**, human *HTT* transcript levels in the cerebrum of BacHD mice (n=4) treated with 10 mg /kg or 50 mg/kg of branaplam and taken down at indicated timepoints. Data are the mean±SEM of 4 mice per group. One-way Anova with Dunnett's multiple comparisons test: \*P = 0.6700. **c**, pseudoexon 50a included transcript levels from blood of BacHD mice (n = 4) treated with a single dose of 10 mg/kg or 50 mg/kg of branaplam analyzed at the indicated timepoints. Data are the mean±SEM of 4 mice per group. One-way Anova with Dunnett's multiple comparisons test: \*\*P = 0.0018, \*\*\*P = 0.0002 and **d**, human *HTT* transcript levels from blood of BacHD mice (n=4) treated with 10 mg /kg or 50 mg/kg of branaplam and taken down at indicated timepoints. Data are the mean±SEM of 4 mice per group. One-way Anova with Dunnett's multiple comparisons test: \*P = 0.0198, \*\*\*P = 0.0002, \*\*\*\*P < 0.0001.

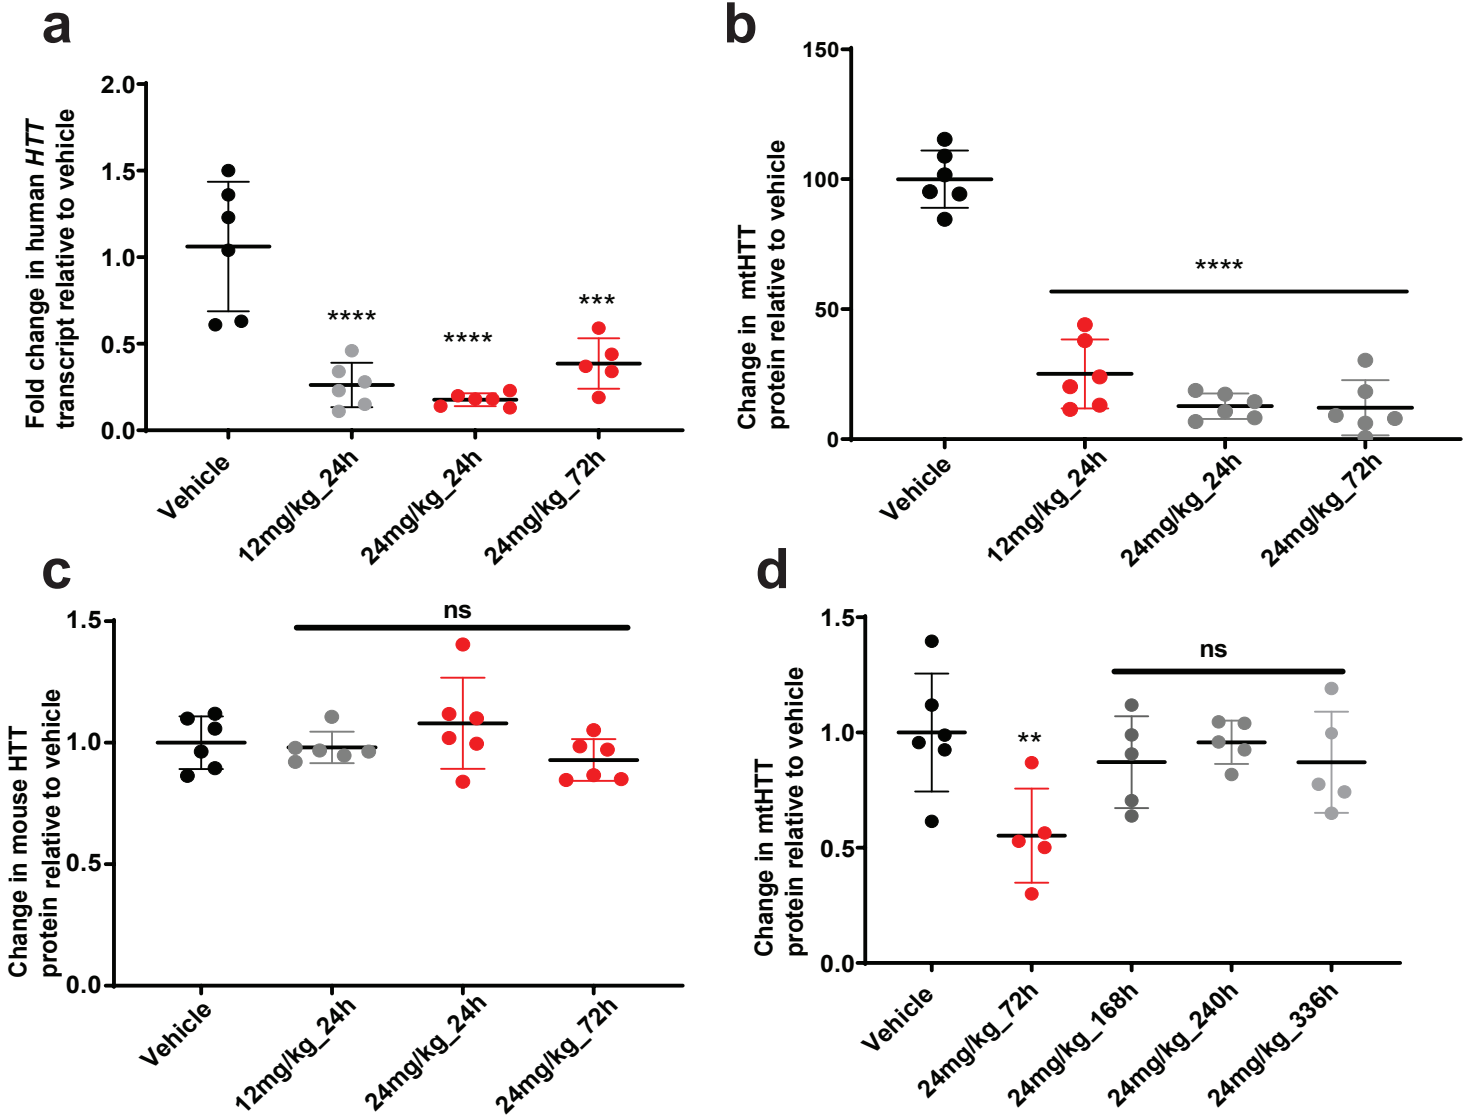

**Supplementary Data Figure 3.** Peripheral and brain *HTT* transcript and protein changes in BacHD mice treated with branaplam. **a**, Quantitative PCR results showing total *HTT* transcript levels in the blood of BacHD mice treated with vehicle or branaplam ( $n = 6$ ). Mice received either 12 mg/kg or 24 mg/kg of branaplam for 3 weeks and blood was analyzed at indicated timepoints. Data are the mean $\pm$ SEM of 6 mice per group. One-way Anova with Dunnett's multiple comparisons test: \*\*\*\*  $P < 0.0001$ . **b**, mtHTT protein levels in the liver of BacHD mice ( $n = 6$ ) treated with 12 mg/kg or 24 mg/kg of branaplam and taken down at indicated timepoints. Data are the mean $\pm$ SEM of 6 mice per group. One-way Anova with Dunnett's multiple comparisons test: \*\*\*\*  $P < 0.0001$ . **c**, Mouse *Htt* protein levels in striatum from BacHD mice treated with vehicle or branaplam ( $n=6$ ) at 12mg/kg or 24 mg/kg and taken down at indicated doses. Data are the mean $\pm$ SEM of 6 mice per group. None of the branaplam treated conditions were significantly different compared to vehicle. **d**, Time-course of mtHTT protein levels in the cortex of BacHD mice ( $n = 6$ ) treated with 12 mg/kg or 24 mg/kg of branaplam and taken down at indicated timepoints. Data are the mean $\pm$ SEM of 6 mice per group. One-way Anova with Dunnett's multiple comparisons test: \*\*  $P = 0.0060$ .

**a**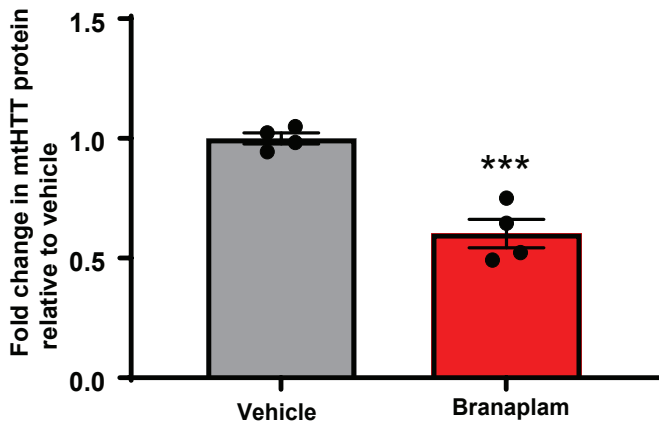**b**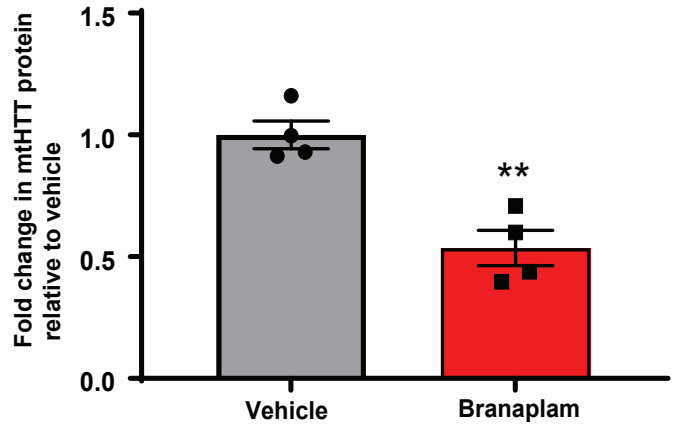

**Supplementary Data Figure 4.** mHTT protein lowering in BachHD mice brain following oral dosing with branaplam **a**, mHTT protein levels in the striatum of BachHD mice (n = 4) treated with 16 doses of 24mg/kg of branaplam. Data is the mean $\pm$ SEM of 4 mice per group. P values in this study were calculated by unpaired t test (Two-tailed Unpaired t-Test: \*\*\*P = 0.0008 **b**, mHTT protein levels in the cortex of BachHD mice (n = 4) treated with 16 doses of 24mg/kg of branaplam. Data is the mean $\pm$ SEM of 4 mice per group. P values in this study were calculated by unpaired t test (Two-tailed). Unpaired t-Test: \*\*P = 0.0023.

### Supplementary Data Table 1

SH-SY5Y cells) treated with 100 nM branaplam for 24 hours. A total of 45 genes exhibited an absolute fold change > 2 with a multiple testing correction (MTC)-adjusted *P* value < 0.01. Statistical analysis was performed with limma/voom. *P* values are two-sided and multiplicity adjusted.

| Ensembl Gene ID | Description                                                                                  | hgnc Symbol | log <sub>FC</sub> | adj. P value |
|-----------------|----------------------------------------------------------------------------------------------|-------------|-------------------|--------------|
| ENSG00000180957 | phosphatidylinositol transfer protein beta                                                   | PITPNB      | -2.90671          | 3.41E-07     |
| ENSG00000088930 | 5'-3' exoribonuclease 2                                                                      | XRN2        | -2.69807          | 1.04E-06     |
| ENSG00000139734 | diaphanous related formin 3                                                                  | DIAPH3      | -1.71324          | 3.01E-06     |
| ENSG00000179889 | pyridoxal dependent decarboxylase domain containing 1                                        | PDXDC1      | -2.85615          | 3.01E-06     |
| ENSG00000228716 | dihydrofolate reductase                                                                      | DHFR        | -1.63086          | 3.01E-06     |
| ENSG00000156052 | G protein subunit alpha q                                                                    | GNAQ        | -2.01613          | 4.10E-06     |
| ENSG00000137710 | radixin                                                                                      | RDX         | -1.23828          | 6.04E-06     |
| ENSG00000163507 | cellular inhibitor of PP2A                                                                   | CIP2A       | -1.49306          | 6.04E-06     |
| ENSG00000119537 | 3-ketodihydrosphingosine reductase                                                           | KDSR        | -1.69007          | 1.84E-05     |
| ENSG00000153914 | splicing regulatory glutamic acid and lysine rich protein 1                                  | SREK1       | -1.31531          | 1.84E-05     |
| ENSG00000164329 | terminal nucleotidyltransferase 2                                                            | TENT2       | -1.32786          | 1.84E-05     |
| ENSG00000197386 | huntingtin                                                                                   | HTT         | -1.07408          | 1.90E-05     |
| ENSG00000113643 | arginyl-tRNA synthetase 1                                                                    | RARS1       | -1.09349          | 2.23E-05     |
| ENSG00000112146 | F-box protein 9                                                                              | FBXO9       | -1.39965          | 4.00E-05     |
| ENSG00000103064 | solute carrier family 7 member 6                                                             | SLC7A6      | -1.10575          | 4.30E-05     |
| ENSG00000156298 | tetraspanin 7                                                                                | TSPAN7      | -2.04839          | 4.30E-05     |
| ENSG00000134775 | formin homology 2 domain containing 3                                                        | FHOD3       | -1.17727          | 4.31E-05     |
| ENSG00000162687 | potassium sodium-activated channel subfamily T member 2                                      | KCNT2       | -1.40537          | 4.31E-05     |
| ENSG00000180198 | regulator of chromosome condensation 1                                                       | RCC1        | 1.24293           | 4.31E-05     |
| ENSG00000250349 | novel proline rich Gla (G-carboxyglutamic acid) 1 (PRRG1) and tetraspanin 7 (TSPAN7) protein |             | -2.04137          | 4.31E-05     |
| ENSG00000110881 | acid sensing ion channel subunit 1                                                           | ASIC1       | -2.13038          | 4.69E-05     |
| ENSG00000101464 | phosphatidylinositol glycan anchor biosynthesis class U                                      | PIGU        | -1.05053          | 4.99E-05     |
| ENSG00000144320 | lunapark, ER junction formation factor                                                       | LNPK        | -1.09676          | 5.93E-05     |
| ENSG00000064933 | PMS1 homolog 1, mismatch repair system component                                             | PMS1        | -1.30932          | 6.90E-05     |
| ENSG00000137501 | synaptotagmin like 2                                                                         | SYTL2       | 3.871721          | 6.90E-05     |
| ENSG00000054983 | galactosylceramidase                                                                         | GALC        | -1.5173           | 0.000108     |
| ENSG00000100395 | L3MBTL histone methyl-lysine binding protein 2                                               | L3MBTL2     | -1.37989          | 0.000108     |
| ENSG00000109911 | elongator acetyltransferase complex subunit 4                                                | ELP4        | -1.32842          | 0.00014      |
| ENSG00000120471 | tumor protein p53 regulated apoptosis inducing protein 1                                     | TP53AIP1    | 4.210064          | 0.000149     |
| ENSG00000160392 | chromosome 19 open reading frame 47                                                          | C19orf47    | -1.10856          | 0.000149     |
| ENSG00000273820 | ubiquitin specific peptidase 27 X-linked                                                     | USP27X      | -1.72153          | 0.000187     |
| ENSG00000122477 | leucine rich repeat containing 39                                                            | LRRC39      | 2.429588          | 0.000232     |
| ENSG00000007171 | nitric oxide synthase 2                                                                      | NOS2        | 1.400148          | 0.000278     |
| ENSG00000184014 | DENN domain containing 5A                                                                    | DENND5A     | -1.00993          | 0.000288     |
| ENSG00000143196 | dermatopontin                                                                                | DPT         | -1.77668          | 0.000637     |
| ENSG00000103145 | host cell factor C1 regulator 1                                                              | HCFC1R1     | -1.1029           | 0.000804     |
| ENSG00000152475 | zinc finger protein 837                                                                      | ZNF837      | 1.862342          | 0.000804     |
| ENSG00000179284 | DAN domain BMP antagonist family member 5                                                    | DAND5       | -1.18702          | 0.000857     |

|                 |                                          |         |          |          |
|-----------------|------------------------------------------|---------|----------|----------|
| ENSG00000142188 | transmembrane protein 50B                | TMEM50B | -1.05588 | 0.001238 |
| ENSG00000198162 | mannosidase alpha class 1A member 2      | MAN1A2  | -1.09818 | 0.001844 |
| ENSG00000127585 | F-box and leucine rich repeat protein 16 | FBXL16  | -1.15242 | 0.003286 |
| ENSG00000165475 | crystallin lambda 1                      | CRYL1   | -1.75215 | 0.003989 |
| ENSG00000167774 | novel transcript                         |         | -1.01957 | 0.005332 |
| ENSG00000105427 | cornifelin                               | CNFN    | -2.23858 | 0.006539 |
| ENSG00000156345 | cyclin dependent kinase 20               | CDK20   | -1.20958 | 0.009429 |

## Supplementary Data Table 2

SH-SY5Y cells) treated with 100 nM branaplam for 24 hours. A total of 94 pseudoexons map to GENCODE genes and show an absolute fold change > 2 and a multiple testing correction (MTC)-adjusted *P* value < 0.01. Statistical analysis was performed with limma/voom. *P* values are two-sided and multiplicity adjusted.

| Exon ID                  | log <sub>FC</sub> | Adj. <i>P</i> value | Symbol     | Chr | Start     | End       |
|--------------------------|-------------------|---------------------|------------|-----|-----------|-----------|
| chr16_70527375_70527429  | 8.02112           | 3.34E-11            | SF3B3      | 16  | 70527375  | 70527429  |
| chr5_77774184_77774217   | 7.83225           | 8.86E-10            | TBCA       | 5   | 77774184  | 77774217  |
| chr1_98738659_98738803   | 7.6699            | 3.34E-11            | SNX7       | 1   | 98738659  | 98738803  |
| chr12_4537379_4537514    | 7.32822           | 2.06E-10            | C12orf4    | 12  | 4537379   | 4537514   |
| chr12_895160_895196      | 6.91717           | 1.24E-10            | WNK1       | 12  | 895160    | 895196    |
| chr18_55535558_55535637  | 6.81571           | 2.69E-10            | TCF4       | 18  | 55535558  | 55535637  |
| chr8_47273336_47273450   | 6.70626           | 2.06E-10            | SPIDR      | 8   | 47273336  | 47273450  |
| chr2_8820966_8821102     | 6.66208           | 1.63E-09            | KIDINS220  | 2   | 8820966   | 8821102   |
| chr5_119457290_119457368 | 6.4788            | 3.35E-09            | HSD17B4    | 5   | 119457290 | 119457368 |
| chr6_97201361_97201466   | 6.34876           | 8.29E-10            | MMS22L     | 6   | 97201361  | 97201466  |
| chr17_3647737_3647847    | 6.34502           | 1.49E-10            | CTNS       | 17  | 3647737   | 3647847   |
| chr16_24758438_24758599  | 6.33985           | 3.35E-09            | TNRC6A     | 16  | 24758438  | 24758599  |
| chr10_21728631_21728675  | 6.14493           | 2.57E-10            | MLLT10     | 10  | 21728631  | 21728675  |
| chr2_27037261_27037300   | 6.14159           | 8.54E-10            | TMEM214    | 2   | 27037261  | 27037300  |
| chr7_101948854_101948970 | 6.07441           | 2.90E-10            | CUX1       | 7   | 101948854 | 101948970 |
| chr12_40869291_40869394  | 5.93415           | 6.16E-09            | CNTN1      | 12  | 40869291  | 40869394  |
| chr12_40869295_40869394  | 5.93415           | 6.16E-09            | CNTN1      | 12  | 40869295  | 40869394  |
| chr2_2055809_2056066     | 5.89886           | 7.32E-10            | MYT1L      | 2   | 2055809   | 2056066   |
| chr2_201470906_201471111 | 5.84198           | 5.78E-09            | STRADB     | 2   | 201470906 | 201471111 |
| chr5_51545529_51545767   | 5.83233           | 6.38E-09            | AC022433.1 | 5   | 51545529  | 51545767  |
| chr13_72725641_72725778  | 5.82948           | 3.03E-09            | MZT1       | 13  | 72725641  | 72725778  |
| chr4_5741333_5741441     | 5.79592           | 8.86E-10            | EVC        | 4   | 5741333   | 5741441   |
| chr19_36400284_36400403  | 5.77568           | 3.17E-09            | ZFP82      | 19  | 36400284  | 36400403  |
| chr14_32150458_32150566  | 5.54797           | 3.17E-09            | ARHGAP5    | 14  | 32150458  | 32150566  |
| chr7_133794224_133794324 | 5.54064           | 4.37E-09            | EXOC4      | 7   | 133794224 | 133794324 |
| chr18_36742376_36742468  | 5.51839           | 5.53E-08            | FHOD3      | 18  | 36742376  | 36742468  |
| chr3_108192475_108192526 | 5.49749           | 3.17E-09            | IFT57      | 3   | 108192475 | 108192526 |
| chr22_21578780_21578838  | 5.42634           | 2.57E-09            | UBE2L3     | 22  | 21578780  | 21578838  |
| chr16_70544168_70544249  | 5.30709           | 3.14E-08            | SF3B3      | 16  | 70544168  | 70544249  |
| chr7_82067208_82067256   | 5.29629           | 1.78E-08            | CACNA2D1   | 7   | 82067208  | 82067256  |
| chr10_77812712_77812773  | 5.26504           | 1.76E-08            | DLG5       | 10  | 77812712  | 77812773  |
| chr4_102853037_102853083 | 5.25868           | 4.37E-09            | UBE2D3     | 4   | 102853037 | 102853083 |
| chr1_84105240_84105388   | 5.25453           | 7.35E-08            | PRKACB     | 1   | 84105240  | 84105388  |
| chr1_84105245_84105388   | 5.25453           | 7.35E-08            | PRKACB     | 1   | 84105245  | 84105388  |
| chr5_122898141_122898236 | 5.24644           | 9.22E-08            | SNX24      | 5   | 122898141 | 122898236 |
| chr3_49397004_49397122   | 5.21737           | 1.50E-08            | RHOA       | 3   | 49397004  | 49397122  |
| chr12_39441961_39442087  | 5.2108            | 2.79E-09            | KIF21A     | 12  | 39441961  | 39442087  |
| chr8_22643371_22643742   | 5.09941           | 2.60E-08            | BIN3       | 8   | 22643371  | 22643742  |
| chr21_37422581_37422652  | 5.09026           | 2.51E-08            | DYRK1A     | 21  | 37422581  | 37422652  |
| chr6_110984306_110984363 | 5.07173           | 1.76E-08            | RPF2       | 6   | 110984306 | 110984363 |
| chr21_31268410_31268695  | 5.0307            | 1.57E-07            | TIAM1      | 21  | 31268410  | 31268695  |
| chr16_70544168_70544207  | 4.96945           | 8.15E-08            | SF3B3      | 16  | 70544168  | 70544207  |
| chr9_77920661_77920702   | 4.95553           | 1.76E-08            | GNAQ       | 9   | 77920661  | 77920702  |

|                          |         |             |                        |    |           |           |
|--------------------------|---------|-------------|------------------------|----|-----------|-----------|
| chr8_116861153_116861297 | 4.95166 | 3.87E-07    | RAD21                  | 8  | 116861153 | 116861297 |
| chr7_137001862_137002057 | 4.95107 | 3.35E-09    | CHRM2                  | 7  | 137001862 | 137002057 |
| chr2_31887034_31887087   | 4.94023 | 2.60E-07    | MEMO1                  | 2  | 31887034  | 31887087  |
| chr11_76548927_76549017  | 4.86385 | 2.52E-08    | EMSY                   | 11 | 76548927  | 76549017  |
| chr19_8814260_8814371    | 4.80908 | 6.58E-08    | ZNF558                 | 19 | 8814260   | 8814371   |
| chr5_80632231_80632302   | 4.79421 | 6.53E-09    | DHFR                   | 5  | 80632231  | 80632302  |
| chr12_42095150_42095214  | 4.71684 | 2.04E-07    | GXYLT1                 | 12 | 42095150  | 42095214  |
| chr6_100636927_100636984 | 4.69586 | 4.82E-08    | ASCC3                  | 6  | 100636927 | 100636984 |
| chr9_123454002_123454051 | 4.67422 | 4.82E-08    | DENND1A                | 9  | 123454002 | 123454051 |
| chr12_20602224_20602321  | 4.63816 | 1.04E-07    | PDE3A                  | 12 | 20602224  | 20602321  |
| chr17_38312586_38312661  | 4.638   | 3.42E-07    | MRPL45                 | 17 | 38312586  | 38312661  |
| chr7_43905371_43905451   | 4.63788 | 4.55E-07    | URGCP-<br>MRPS24,URGCP | 7  | 43905371  | 43905451  |
| chr2_75702708_75702807   | 4.5743  | 3.23E-06    | GCFC2                  | 2  | 75702708  | 75702807  |
| chr4_3213621_3213736     | 4.44684 | 4.82E-08    | HTT                    | 4  | 3213621   | 3213736   |
| chr1_35020260_35020279   | 4.44672 | 6.58E-08    | ZMYM6,<br>AC114490.2   | 1  | 35020260  | 35020279  |
| chr6_75621926_75621971   | 4.3645  | 2.05E-07    | SENPE6                 | 6  | 75621926  | 75621971  |
| chr10_68680871_68680967  | 4.31289 | 1.81E-06    | TET1                   | 10 | 68680871  | 68680967  |
| chr7_64541729_64541917   | 4.30358 | 3.40E-07    | ZNF680                 | 7  | 64541729  | 64541917  |
| chrX_101156521_101156555 | 4.27255 | 6.14E-07    | CENPI                  | X  | 101156521 | 101156555 |
| chr2_6973931_6974023     | 4.25244 | 8.87E-07    | RNF144A                | 2  | 6973931   | 6974023   |
| chr6_169661702_169661750 | 4.17289 | 3.15E-06    | AL031315.1, WDR27      | 6  | 169661702 | 169661750 |
| chr19_39836893_39836973  | 4.0321  | 2.45E-07    | FBL                    | 19 | 39836893  | 39836973  |
| chr6_170544320_170544366 | 4.00533 | 6.20E-06    | PSMB1                  | 6  | 170544320 | 170544366 |
| chr9_133109193_133109278 | 3.9624  | 1.99E-07    | AL162417.1,RALGDS      | 9  | 133109193 | 133109278 |
| chr1_37494139_37494163   | 3.93041 | 4.73E-06    | MEAF6                  | 1  | 37494139  | 37494163  |
| chr10_68907910_68907970  | 3.72181 | 6.18E-06    | DDX50                  | 10 | 68907910  | 68907970  |
| chr9_125964037_125964198 | 3.66576 | 4.91E-07    | PBX3                   | 9  | 125964037 | 125964198 |
| chr1_211304989_211305151 | 3.6514  | 6.86E-07    | RCOR3                  | 1  | 211304989 | 211305151 |
| chr3_108565897_108565931 | 3.54176 | 9.04E-05    | CIP2A                  | 3  | 108565897 | 108565931 |
| chr2_110638984_110639069 | 3.51955 | 3.65E-05    | BUB1                   | 2  | 110638984 | 110639069 |
| chr4_112638617_112638673 | 3.39139 | 3.87E-07    | LARP7                  | 4  | 112638617 | 112638673 |
| chr19_14173295_14173399  | 3.38153 | 8.79E-05    | ADGRL1                 | 19 | 14173295  | 14173399  |
| chr17_65015912_65016040  | 3.30508 | 6.84E-06    | GNA13                  | 17 | 65015912  | 65016040  |
| chr1_225600207_225600362 | 3.28521 | 8.86E-10    | ENAH                   | 1  | 225600207 | 225600362 |
| chr20_21345833_21345887  | 3.27557 | 1.13E-06    | XRN2                   | 20 | 21345833  | 21345887  |
| chr9_123452825_123452908 | 3.22454 | 7.46E-06    | DENND1A                | 9  | 123452825 | 123452908 |
| chr14_66987935_66988007  | 3.10933 | 0.00025058  | GPHN                   | 14 | 66987935  | 66988007  |
| chr3_108565897_108566078 | 2.99823 | 0.000487262 | CIP2A                  | 3  | 108565897 | 108566078 |
| chr2_36884519_36884606   | 2.74115 | 3.20E-05    | STRN                   | 2  | 36884519  | 36884606  |
| chr19_45691162_45691293  | 2.71347 | 0.00052116  | SNRPD2                 | 19 | 45691162  | 45691293  |
| chr2_8810660_8810778     | 2.64457 | 3.79E-05    | KIDINS220              | 2  | 8810660   | 8810778   |
| chr5_79641454_79641517   | 2.58341 | 6.39E-05    | TENT2                  | 5  | 79641454  | 79641517  |
| chr8_79631016_79631127   | 2.52256 | 1.62E-05    | STMN2                  | 8  | 79631016  | 79631127  |
| chr3_108566041_108566078 | 2.47737 | 0.002060581 | CIP2A                  | 3  | 108566041 | 108566078 |
| chr10_75230410_75230450  | 2.37965 | 0.0001598   | VDAC2                  | 10 | 75230410  | 75230450  |
| chr11_75602633_75602718  | 2.34905 | 0.00021672  | MAP6                   | 11 | 75602633  | 75602718  |
| chr3_125470565_125470661 | 2.34275 | 0.000155183 | SNX4                   | 3  | 125470565 | 125470661 |
| chr5_71038428_71038481   | 2.06474 | 0.000663706 | GTF2H2                 | 5  | 71038428  | 71038481  |



|                        |         |             |            |   |          |          |
|------------------------|---------|-------------|------------|---|----------|----------|
| chr4_41749199_41749342 | 1.93646 | 7.47E-06    | AC105389.3 | 4 | 41749199 | 41749342 |
| chr2_68315707_68315843 | 1.92446 | 6.59E-05    | CNRIP1     | 2 | 68315707 | 68315843 |
| chr8_65721146_65721297 | 1.90499 | 0.001182493 | PDE7A      | 8 | 65721146 | 65721297 |

### Supplementary Data Table 3

SH-SY5Y cells) treated with 100 nM branaplam for 24 hours in a washout experiment. A total of 69 genes exhibited an absolute fold change > 2 with a multiple testing correction (MTC)-adjusted *P* value < 0.01. Statistical analysis was performed with limma/voom. *P* values are two-sided and multiplicity adjusted.

| Ensembl Gene ID | Description                                                 | hgnc Symbol | log <sub>FC</sub> | adj. P value |
|-----------------|-------------------------------------------------------------|-------------|-------------------|--------------|
| ENSG00000088930 | 5'-3' exoribonuclease 2                                     | XRN2        | -2.99093          | 6.09E-09     |
| ENSG00000179889 | pyridoxal dependent decarboxylase domain containing 1       | PDXDC1      | -3.24261          | 6.09E-09     |
| ENSG00000180957 | phosphatidylinositol transfer protein beta                  | PITPNB      | -3.35755          | 2.31E-08     |
| ENSG00000100395 | L3MBTL histone methyl-lysine binding protein 2              | L3MBTL2     | -1.78873          | 3.82E-07     |
| ENSG00000119537 | 3-ketodihydrosphingosine reductase                          | KDSR        | -2.05296          | 1.60E-06     |
| ENSG00000054983 | galactosylceramidase                                        | GALC        | -1.82013          | 3.36E-06     |
| ENSG00000112146 | F-box protein 9                                             | FBXO9       | -1.98915          | 5.65E-06     |
| ENSG00000137501 | synaptotagmin like 2                                        | SYTL2       | 4.006548          | 7.86E-06     |
| ENSG00000184014 | DENN domain containing 5A                                   | DENND5A     | -1.43631          | 8.17E-06     |
| ENSG00000071794 | helicase like transcription factor                          | HLTF        | -1.22284          | 8.61E-06     |
| ENSG00000137710 | radixin                                                     | RDX         | -1.49585          | 1.86E-05     |
| ENSG00000160392 | chromosome 19 open reading frame 47                         | C19orf47    | -1.38572          | 1.86E-05     |
| ENSG00000163507 | cellular inhibitor of PP2A                                  | CIP2A       | -1.90559          | 1.86E-05     |
| ENSG00000103064 | solute carrier family 7 member 6                            | SLC7A6      | -1.29953          | 2.18E-05     |
| ENSG00000103145 | host cell factor C1 regulator 1                             | HCFC1R1     | -1.38967          | 2.18E-05     |
| ENSG00000153914 | splicing regulatory glutamic acid and lysine rich protein 1 | SREK1       | -1.70588          | 2.18E-05     |
| ENSG00000198162 | mannosidase alpha class 1A member 2                         | MAN1A2      | -1.64448          | 2.20E-05     |
| ENSG00000008277 | ADAM metallopeptidase domain 22                             | ADAM22      | -1.60432          | 2.79E-05     |
| ENSG00000105427 | cornifelin                                                  | CNFN        | -2.80441          | 2.79E-05     |
| ENSG00000134775 | formin homology 2 domain containing 3                       | FHOD3       | -1.35916          | 2.95E-05     |
| ENSG00000064933 | PMS1 homolog 1, mismatch repair system component            | PMS1        | -1.64507          | 3.23E-05     |
| ENSG00000115970 | THADA armadillo repeat containing                           | THADA       | -1.09815          | 3.52E-05     |
| ENSG00000156052 | G protein subunit alpha q                                   | GNAQ        | -2.28653          | 3.90E-05     |
| ENSG00000162959 | mediator of cell motility 1                                 | MEMO1       | -1.19117          | 3.90E-05     |
| ENSG00000166938 | DIS3 like exosome 3'-5' exoribonuclease                     | DIS3L       | -1.18676          | 3.90E-05     |
| ENSG00000109911 | elongator acetyltransferase complex subunit 4               | ELP4        | -1.42475          | 4.29E-05     |
| ENSG00000197386 | huntingtin                                                  | HTT         | -1.32846          | 4.29E-05     |
| ENSG00000228716 | dihydrofolate reductase                                     | DHFR        | -1.97679          | 4.29E-05     |
| ENSG00000273820 | ubiquitin specific peptidase 27 X-linked                    | USP27X      | -1.67403          | 4.56E-05     |
| ENSG00000164329 | terminal nucleotidyltransferase 2                           | TENT2       | -1.28309          | 5.18E-05     |
| ENSG00000090372 | striatin 4                                                  | STRN4       | -1.1077           | 5.60E-05     |
| ENSG00000139734 | diaphanous related formin 3                                 | DIAPH3      | -2.04821          | 7.68E-05     |
| ENSG00000168803 | adenosine deaminase like                                    | ADAL        | -1.1489           | 8.25E-05     |
| ENSG00000180198 | regulator of chromosome condensation 1                      | RCC1        | 1.652608          | 8.25E-05     |
| ENSG00000151468 | coiled-coil domain containing 3                             | CCDC3       | -1.82671          | 8.32E-05     |
| ENSG00000110881 | acid sensing ion channel subunit 1                          | ASIC1       | -2.93288          | 8.39E-05     |
| ENSG00000143702 | centrosomal protein 170                                     | CEP170      | -1.41616          | 9.13E-05     |
| ENSG00000151208 | discs large MAGUK scaffold protein 5                        | DLG5        | -1.10008          | 9.69E-05     |
| ENSG00000113643 | arginyl-tRNA synthetase 1                                   | RARS1       | -1.23982          | 0.000127     |

|                 |                                                                                              |          |          |          |
|-----------------|----------------------------------------------------------------------------------------------|----------|----------|----------|
| ENSG00000127585 | F-box and leucine rich repeat protein 16                                                     | FBXL16   | -1.49953 | 0.000132 |
| ENSG00000018510 | alkylglycerone phosphate synthase                                                            | AGPS     | -1.39242 | 0.000132 |
| ENSG00000156298 | tetraspanin 7                                                                                | TSPAN7   | -2.23282 | 0.000265 |
| ENSG00000070785 | eukaryotic translation initiation factor 2B subunit gamma                                    | EIF2B3   | -1.21753 | 0.000288 |
| ENSG00000170962 | platelet derived growth factor D                                                             | PDGFD    | -1.50681 | 0.000288 |
| ENSG00000007171 | nitric oxide synthase 2                                                                      | NOS2     | 1.197153 | 0.000367 |
| ENSG00000143196 | dermatopontin                                                                                | DPT      | -2.63858 | 0.000382 |
| ENSG00000119522 | DENN domain containing 1A                                                                    | DENND1A  | -1.10337 | 0.00042  |
| ENSG00000153317 | ArfGAP with SH3 domain, ankyrin repeat and PH domain 1                                       | ASAP1    | -1.18256 | 0.00042  |
| ENSG00000105202 | fibrillarlin                                                                                 | FBL      | -1.02063 | 0.000553 |
| ENSG00000101773 | RB binding protein 8, endonuclease                                                           | RBBP8    | -1.00639 | 0.000699 |
| ENSG00000115556 | phospholipase C delta 4                                                                      | PLCD4    | -1.13521 | 0.001271 |
| ENSG00000152475 | zinc finger protein 837                                                                      | ZNF837   | 1.416362 | 0.001271 |
| ENSG00000100234 | TIMP metalloproteinase inhibitor 3                                                           | TIMP3    | -1.13682 | 0.001538 |
| ENSG00000158286 | ring finger protein 207                                                                      | RNF207   | -1.38223 | 0.001974 |
| ENSG00000156345 | cyclin dependent kinase 20                                                                   | CDK20    | -1.91468 | 0.002142 |
| ENSG00000162687 | potassium sodium-activated channel subfamily T member 2                                      | KCNT2    | -1.42879 | 0.002166 |
| ENSG00000204334 | glutamate rich 2                                                                             | ERICH2   | 3.482546 | 0.002984 |
| ENSG00000170627 | gametocyte specific factor 1                                                                 | GTSF1    | -1.03755 | 0.003058 |
| ENSG00000132570 | pterin-4 alpha-carbinolamine dehydratase 2                                                   | PCBD2    | -1.02002 | 0.003874 |
| ENSG00000250349 | novel proline rich Gla (G-carboxyglutamic acid) 1 (PRRG1) and tetraspanin 7 (TSPAN7) protein |          | -1.99722 | 0.003917 |
| ENSG00000145194 | endothelin converting enzyme 2                                                               | ECE2     | -2.93703 | 0.003961 |
| ENSG00000122477 | leucine rich repeat containing 39                                                            | LRRC39   | 1.742848 | 0.00433  |
| ENSG00000140470 | ADAM metalloproteinase with thrombospondin type 1 motif 17                                   | ADAMTS17 | -1.23943 | 0.005732 |
| ENSG00000083642 | PDS5 cohesin associated factor B                                                             | PDS5B    | -1.00518 | 0.006438 |
| ENSG00000157734 | sorting nexin 22                                                                             | SNX22    | -1.20121 | 0.007196 |
| ENSG00000149084 | hydroxysteroid 17-beta dehydrogenase 12                                                      | HSD17B12 | -1.00209 | 0.007454 |
| ENSG00000176658 | myosin ID                                                                                    | MYO1D    | -1.07417 | 0.007454 |
| ENSG00000136205 | tensin 3                                                                                     | TNS3     | -2.0102  | 0.007887 |
| ENSG00000165475 | crystallin lambda 1                                                                          | CRYL1    | -1.74565 | 0.007935 |

#### Supplementary Data Table 4

SH-SY5Y cells) treated with 100 nM branaplam for 24 hours in a washout experiment. A total of 138 pseudoexons map to GENCODE genes and show an absolute fold change > 2 and a multiple testing correction (MTC)-adjusted *P* value < 0.01. The two pseudoexon-gene pairs not reversed after 48 hours post-washout are marked with an asterix. Statistical analysis was performed with limma/voom. *P* values are two-sided and multiplicity adjusted.

| exon ID                  | log FC  | adj.P.Val | symbol             | chr | start    | end      |
|--------------------------|---------|-----------|--------------------|-----|----------|----------|
| chr1_98738659_98738803   | 9.46006 | 4.18E-09  | SNX7               | 1   | 98738659 | 98738803 |
| chr16_70527375_70527429  | 8.80107 | 2.96E-09  | SF3B3              | 16  | 70527375 | 70527429 |
| chr12_4537379_4537514    | 8.1412  | 4.59E-09  | C12orf4            | 12  | 4537379  | 4537514  |
| chr5_51545529_51545767   | 8.02606 | 2.63E-09  | AC022433.1         | 5   | 51545529 | 51545767 |
| chr5_77774184_77774217*  | 8.02298 | 7.51E-10  | TBCA               | 5   | 77774184 | 77774217 |
| chr13_72725641_72725778  | 7.82707 | 2.63E-09  | MZT1               | 13  | 72725641 | 72725778 |
| chr2_201470906_201471111 | 7.74574 | 3.06E-08  | STRADB             | 2   | 2.01E+08 | 2.01E+08 |
| chr5_119457290_119457368 | 7.71537 | 2.96E-09  | HSD17B4            | 5   | 1.19E+08 | 1.19E+08 |
| chr18_55535558_55535637  | 7.40754 | 2.63E-09  | TCF4               | 18  | 55535558 | 55535637 |
| chr8_22643371_22643742   | 7.37381 | 2.63E-09  | BIN3               | 8   | 22643371 | 22643742 |
| chr6_97201361_97201466   | 7.02411 | 4.51E-09  | MMS22L             | 6   | 97201361 | 97201466 |
| chr16_70544168_70544249  | 7.00002 | 1.56E-07  | SF3B3              | 16  | 70544168 | 70544249 |
| chr2_27037261_27037300   | 6.98892 | 4.51E-08  | TMEM214            | 2   | 27037261 | 27037300 |
| chr12_40869295_40869394  | 6.94602 | 2.78E-08  | CNTN1              | 12  | 40869295 | 40869394 |
| chr12_895160_895196      | 6.82617 | 4.51E-09  | WNK1               | 12  | 895160   | 895196   |
| chr1_84105240_84105388   | 6.76157 | 3.60E-07  | PRKACB             | 1   | 84105240 | 84105388 |
| chr1_84105245_84105388   | 6.76157 | 3.60E-07  | PRKACB             | 1   | 84105245 | 84105388 |
| chr14_32150458_32150566  | 6.72464 | 9.93E-09  | ARHGAP5            | 14  | 32150458 | 32150566 |
| chr8_47273336_47273450   | 6.70715 | 1.78E-08  | SPIDR              | 8   | 47273336 | 47273450 |
| chr2_8820966_8821102     | 6.70656 | 2.52E-08  | KIDINS220          | 2   | 8820966  | 8821102  |
| chr16_70544168_70544207  | 6.67739 | 2.14E-07  | SF3B3              | 16  | 70544168 | 70544207 |
| chr10_21728631_21728675  | 6.66321 | 1.78E-08  | MLLT10             | 10  | 21728631 | 21728675 |
| chr22_21578780_21578838  | 6.59205 | 1.39E-07  | UBE2L3             | 22  | 21578780 | 21578838 |
| chr10_77812712_77812773  | 6.55859 | 1.00E-06  | DLG5               | 10  | 77812712 | 77812773 |
| chr21_37422581_37422652  | 6.48272 | 6.61E-09  | DYRK1A             | 21  | 37422581 | 37422652 |
| chr8_22643651_22643742   | 6.37355 | 1.12E-08  | BIN3               | 8   | 22643651 | 22643742 |
| chr12_39441961_39442087  | 6.34541 | 1.45E-07  | KIF21A             | 12  | 39441961 | 39442087 |
| chr9_77920661_77920702   | 6.32624 | 4.51E-08  | GNAQ               | 9   | 77920661 | 77920702 |
| chr6_110984306_110984363 | 6.31835 | 1.94E-07  | RPF2               | 6   | 1.11E+08 | 1.11E+08 |
| chr17_3647737_3647847    | 6.26696 | 1.78E-08  | CTNS               | 17  | 3647737  | 3647847  |
| chr1_44318140_44318224   | 6.18443 | 5.40E-07  | ERI3               | 1   | 44318140 | 44318224 |
| chr3_108192475_108192526 | 6.17288 | 3.56E-07  | IFT57              | 3   | 1.08E+08 | 1.08E+08 |
| chr7_43905371_43905451   | 6.1575  | 4.51E-08  | URGCP,URGCP-MRPS24 | 7   | 43905371 | 43905451 |
| chr3_49397004_49397122   | 6.13413 | 1.47E-07  | RHOA               | 3   | 49397004 | 49397122 |
| chr3_49397020_49397122   | 6.12546 | 1.47E-07  | RHOA               | 3   | 49397020 | 49397122 |
| chr9_123454002_123454051 | 6.06606 | 5.55E-08  | DENND1A            | 9   | 1.23E+08 | 1.23E+08 |
| chr19_14173295_14173399  | 6.0367  | 1.69E-07  | ADGRL1             | 19  | 14173295 | 14173399 |
| chr16_24758438_24758599  | 6.02789 | 3.61E-08  | TNRC6A             | 16  | 24758438 | 24758599 |

|                           |         |          |                   |    |          |          |
|---------------------------|---------|----------|-------------------|----|----------|----------|
| chr4_102853037_102853083  | 6.01483 | 1.39E-07 | UBE2D3            | 4  | 1.03E+08 | 1.03E+08 |
| chr21_31268410_31268695   | 5.97196 | 1.35E-07 | TIAM1             | 21 | 31268410 | 31268695 |
| chr19_36400284_36400403   | 5.93222 | 3.13E-08 | ZFP82             | 19 | 36400284 | 36400403 |
| chr2_171441858_171442036  | 5.85479 | 5.05E-08 | DCAF17            | 2  | 1.71E+08 | 1.71E+08 |
| chr1_184446151_184446247  | 5.84901 | 3.57E-08 | C1orf21           | 1  | 1.84E+08 | 1.84E+08 |
| chr2_31887034_31887087    | 5.8209  | 3.42E-08 | MEMO1             | 2  | 31887034 | 31887087 |
| chr7_133794224_133794324  | 5.64436 | 4.49E-08 | EXOC4             | 7  | 1.34E+08 | 1.34E+08 |
| chr2_75702690_75702807    | 5.64124 | 1.73E-07 | GCFC2             | 2  | 75702690 | 75702807 |
| chr2_64112562_64112672    | 5.63083 | 7.59E-07 | PELI1             | 2  | 64112562 | 64112672 |
| chr2_75702708_75702807    | 5.62967 | 1.73E-07 | GCFC2             | 2  | 75702708 | 75702807 |
| chr5_111750351_111750425  | 5.55037 | 8.12E-07 | NREP              | 5  | 1.12E+08 | 1.12E+08 |
| chr2_6973931_6974023      | 5.52931 | 8.14E-08 | RNF144A           | 2  | 6973931  | 6974023  |
| chr17_38312586_38312661   | 5.51276 | 3.60E-07 | MRPL45            | 17 | 38312586 | 38312661 |
| chr4_5741333_5741441      | 5.49251 | 1.73E-07 | EVC               | 4  | 5741333  | 5741441  |
| chr7_101948854_101948970  | 5.43449 | 8.15E-08 | CUX1              | 7  | 1.02E+08 | 1.02E+08 |
| chr17_2031899_2031943     | 5.2438  | 5.66E-07 | DPH1              | 17 | 2031899  | 2031943  |
| chr22_35267367_35267514   | 5.19672 | 1.68E-05 | HMGXB4            | 22 | 35267367 | 35267514 |
| chr1_35020260_35020279    | 5.18851 | 1.68E-05 | ZMYM6,AC114490.2  | 1  | 35020260 | 35020279 |
| chr11_76548927_76549017   | 5.15707 | 1.41E-06 | EMSY              | 11 | 76548927 | 76549017 |
| chr8_116861153_116861297  | 5.11232 | 2.97E-06 | RAD21             | 8  | 1.17E+08 | 1.17E+08 |
| chr7_64541729_64541917    | 5.10935 | 3.50E-07 | ZNF680            | 7  | 64541729 | 64541917 |
| chr9_133109193_133109278  | 4.99446 | 3.14E-05 | AL162417.1,RALGDS | 9  | 1.33E+08 | 1.33E+08 |
| chr1_66585671_66585848    | 4.98692 | 2.13E-05 | SGIP1             | 1  | 66585671 | 66585848 |
| chr17_50720828_50720880   | 4.86219 | 2.36E-06 | LUC7L3            | 17 | 50720828 | 50720880 |
| chr11_13419276_13419343   | 4.81325 | 2.51E-06 | BTBD10            | 11 | 13419276 | 13419343 |
| chr5_80632231_80632302    | 4.78762 | 1.49E-07 | DHFR              | 5  | 80632231 | 80632302 |
| chr4_22447329_22447356    | 4.77113 | 3.75E-05 | ADGRA3            | 4  | 22447329 | 22447356 |
| chr9_125964037_125964198  | 4.69762 | 0.000108 | PBX3              | 9  | 1.26E+08 | 1.26E+08 |
| chrX_101156521_101156555  | 4.66155 | 3.39E-06 | CENPI             | X  | 1.01E+08 | 1.01E+08 |
| chr10_101848399_101848474 | 4.65801 | 1.62E-05 | ARMH3             | 10 | 1.02E+08 | 1.02E+08 |
| chr6_75621926_75621971    | 4.58977 | 6.28E-07 | SENP6             | 6  | 75621926 | 75621971 |
| chr4_3213621_3213736 *    | 4.54014 | 1.41E-06 | HTT               | 4  | 3213621  | 3213736  |
| chr4_56325387_56325471    | 4.4685  | 2.04E-05 | CRACD             | 4  | 56325387 | 56325471 |
| chr14_66987935_66988007   | 4.39703 | 7.80E-05 | GPHN              | 14 | 66987935 | 66988007 |
| chr10_70166275_70166393   | 4.30071 | 2.82E-05 | SAR1A             | 10 | 70166275 | 70166393 |
| chr3_138206674_138206717  | 4.26948 | 1.71E-05 | ARMC8             | 3  | 1.38E+08 | 1.38E+08 |
| chr12_42095150_42095214   | 4.26006 | 1.03E-05 | GXYLT1            | 12 | 42095150 | 42095214 |
| chr5_78647681_78647738    | 4.25315 | 2.44E-05 | LHFPL2            | 5  | 78647681 | 78647738 |
| chr2_189818737_189818829  | 4.17121 | 0.000626 | PMS1              | 2  | 1.90E+08 | 1.90E+08 |
| chr10_45459739_45459877   | 4.15122 | 3.73E-05 | MARCHF8           | 10 | 45459739 | 45459877 |
| chr1_154262172_154262202  | 4.11869 | 8.99E-06 | UBAP2L            | 1  | 1.54E+08 | 1.54E+08 |
| chr15_55195664_55195822   | 4.10566 | 2.93E-06 | RSL24D1           | 15 | 55195664 | 55195822 |
| chr5_78647681_78647811    | 4.09647 | 4.74E-05 | LHFPL2            | 5  | 78647681 | 78647811 |
| chr1_37494139_37494163    | 4.07451 | 5.61E-05 | MEAF6             | 1  | 37494139 | 37494163 |
| chr1_161870971_161871061  | 4.0647  | 2.34E-05 | ATF6              | 1  | 1.62E+08 | 1.62E+08 |
| chr3_108565897_108565931  | 4.00725 | 0.000206 | CIP2A             | 3  | 1.09E+08 | 1.09E+08 |
| chr10_75230410_75230450   | 3.98156 | 3.61E-08 | VDAC2             | 10 | 75230410 | 75230450 |

|                          |         |          |                  |    |          |          |
|--------------------------|---------|----------|------------------|----|----------|----------|
| chr5_72283504_72283658   | 3.9621  | 0.00044  | MRPS27           | 5  | 72283504 | 72283658 |
| chr15_55195746_55195822  | 3.93617 | 2.00E-05 | RSL24D1          | 15 | 55195746 | 55195822 |
| chr9_123452825_123452908 | 3.90631 | 1.28E-05 | DENND1A          | 9  | 1.23E+08 | 1.23E+08 |
| chr5_175819435_175819490 | 3.90071 | 0.000365 | CPLX2            | 5  | 1.76E+08 | 1.76E+08 |
| chr1_211304989_211305151 | 3.88785 | 7.36E-05 | RCOR3            | 1  | 2.11E+08 | 2.11E+08 |
| chr19_8814260_8814371    | 3.8827  | 0.000113 | ZNF558           | 19 | 8814260  | 8814371  |
| chr7_137001862_137002057 | 3.84545 | 5.44E-09 | CHRM2            | 7  | 1.37E+08 | 1.37E+08 |
| chr18_62097680_62097764  | 3.79201 | 0.000349 | PIGN             | 18 | 62097680 | 62097764 |
| chr6_84222977_84223068   | 3.664   | 0.000299 | CEP162           | 6  | 84222977 | 84223068 |
| chr18_63340935_63341080  | 3.65373 | 4.12E-05 | KDSR             | 18 | 63340935 | 63341080 |
| chr14_22571878_22571964  | 3.62852 | 0.000108 | DAD1             | 14 | 22571878 | 22571964 |
| chr8_79631016_79631127   | 3.60492 | 1.78E-08 | STMN2            | 8  | 79631016 | 79631127 |
| chr11_75601909_75602029  | 3.58614 | 0.000206 | MAP6             | 11 | 75601909 | 75602029 |
| chr6_169661702_169661750 | 3.58204 | 0.000142 | WDR27,AL031315.1 | 6  | 1.70E+08 | 1.70E+08 |
| chr20_21345833_21345887  | 3.56607 | 5.70E-05 | XRN2             | 20 | 21345833 | 21345887 |
| chr6_170544320_170544366 | 3.48503 | 0.00102  | PSMB1            | 6  | 1.71E+08 | 1.71E+08 |
| chr1_225600207_225600362 | 3.44889 | 5.97E-13 | ENAH             | 1  | 2.26E+08 | 2.26E+08 |
| chr19_18927243_18927359  | 3.33144 | 0.00102  | DDX49            | 19 | 18927243 | 18927359 |
| chr19_45691162_45691293  | 3.32648 | 1.45E-06 | SNRPD2           | 19 | 45691162 | 45691293 |
| chr4_112638617_112638673 | 3.29674 | 8.05E-08 | LARP7            | 4  | 1.13E+08 | 1.13E+08 |
| chr2_241347515_241347637 | 3.24557 | 0.000142 | SEPTIN2          | 2  | 2.41E+08 | 2.41E+08 |
| chr6_100636927_100636984 | 3.23514 | 0.000976 | ASCC3            | 6  | 1.01E+08 | 1.01E+08 |
| chr9_14089321_14089359   | 3.08527 | 0.00044  | NFIB             | 9  | 14089321 | 14089359 |
| chr17_65015912_65016040  | 2.99584 | 3.17E-05 | GNA13            | 17 | 65015912 | 65016040 |
| chr19_39836893_39836973  | 2.94087 | 0.00012  | FBL              | 19 | 39836893 | 39836973 |
| chr4_41749199_41749342   | 2.88688 | 1.12E-08 | AC105389.3       | 4  | 41749199 | 41749342 |
| chr10_68907910_68907970  | 2.81238 | 0.00061  | DDX50            | 10 | 68907910 | 68907970 |
| chr2_68313301_68313413   | 2.65845 | 0.001681 | CNRIP1           | 2  | 68313301 | 68313413 |
| chr5_78647437_78647738   | 2.49524 | 1.76E-06 | LHFPL2           | 5  | 78647437 | 78647738 |
| chr7_26206607_26206696   | 2.47537 | 0.002489 | CBX3             | 7  | 26206607 | 26206696 |
| chr5_78647437_78647811   | 2.4747  | 1.50E-06 | LHFPL2           | 5  | 78647437 | 78647811 |
| chr2_8810660_8810778     | 2.43983 | 0.001871 | KIDINS220        | 2  | 8810660  | 8810778  |
| chr7_100706497_100706600 | 2.38446 | 0.006755 | POP7             | 7  | 1.01E+08 | 1.01E+08 |
| chr19_54139275_54139513  | 2.36807 | 0.001716 | CNOT3            | 19 | 54139275 | 54139513 |
| chr11_57557234_57557485  | 2.36625 | 0.001378 | UBE2L6           | 11 | 57557234 | 57557485 |
| chr8_65721146_65721297   | 2.35887 | 0.000112 | PDE7A            | 8  | 65721146 | 65721297 |
| chr19_54128736_54128805  | 2.33387 | 0.000172 | PRPF31           | 19 | 54128736 | 54128805 |
| chr5_79641454_79641517   | 2.27739 | 0.001907 | TENT2            | 5  | 79641454 | 79641517 |
| chr12_2860048_2860145    | 2.26066 | 0.000668 | FOXM1            | 12 | 2860048  | 2860145  |
| chr5_141668470_141668651 | 2.16367 | 0.002511 | ARAP3            | 5  | 1.42E+08 | 1.42E+08 |
| chr3_125470565_125470661 | 2.14864 | 1.94E-05 | SNX4             | 3  | 1.25E+08 | 1.25E+08 |
| chr5_78647437_78647574   | 2.06432 | 3.69E-05 | LHFPL2           | 5  | 78647437 | 78647574 |
| chr3_108565897_108566078 | 1.96501 | 0.007946 | CIP2A            | 3  | 1.09E+08 | 1.09E+08 |
| chr5_71038428_71038481   | 1.91463 | 0.000344 | GTF2H2           | 5  | 71038428 | 71038481 |
| chr5_148411079_148411238 | 1.86666 | 0.003135 | FBXO38           | 5  | 1.48E+08 | 1.48E+08 |
| chr8_79635093_79635253   | 1.83864 | 0.001239 | STMN2            | 8  | 79635093 | 79635253 |
| chr2_68315707_68315843   | 1.76243 | 3.83E-05 | CNRIP1           | 2  | 68315707 | 68315843 |

|                           |         |          |            |    |          |          |
|---------------------------|---------|----------|------------|----|----------|----------|
| chr4_99159420_99159622    | 1.73747 | 0.001846 | AP002026.1 | 4  | 99159420 | 99159622 |
| chr12_105231368_105231644 | 1.72493 | 6.28E-07 | APPL2      | 12 | 1.05E+08 | 1.05E+08 |
| chr5_16068415_16068837    | 1.22332 | 0.000122 | MARCHF11   | 5  | 16068415 | 16068837 |
| chr5_16068415_16068867    | 1.22023 | 0.00012  | MARCHF11   | 5  | 16068415 | 16068867 |
| chr5_16068415_16068908    | 1.20195 | 0.00012  | MARCHF11   | 5  | 16068415 | 16068908 |
| chrX_118028935_118029098  | 1.12301 | 0.001382 | KLHL13     | X  | 1.18E+08 | 1.18E+08 |

**Table 5**

| Animal Species   | Dose                       | Mean plasma concentration (ng/mL) | Tissue / Plasma ratio of mean drug concentrations of drug for defined brain regions |         |                 |
|------------------|----------------------------|-----------------------------------|-------------------------------------------------------------------------------------|---------|-----------------|
|                  |                            |                                   | Frontal cortex                                                                      | Putamen | Caudate nucleus |
| NHP <sup>a</sup> | 0.6 mg/kg/BiW <sup>a</sup> | 11.3                              | 7.81                                                                                | 8.94    | 7.52            |
|                  | 3 mg/kg/BiW <sup>a</sup>   | 74.5                              | 7.57                                                                                | 7.64    | 6.07            |
|                  | 6 mg/kg/BiW <sup>a</sup>   | 102                               | 9.79                                                                                | 10.6    | 8.53            |
| Dog <sup>b</sup> | 0.25 mg/kg/QD <sup>b</sup> | 0.500                             | 19.1                                                                                | na      | 12.6            |
|                  | 2 mg/kg/QD <sup>b</sup>    | 6.23                              | 6.84                                                                                | na      | 6.28            |

a: Tissue and plasma samples collected at 24 h after last dosing of 6 weeks of bi-weekly administration

b: Tissue and plasma samples collected at 24 h after last dosing at Day 7 of daily administration
